# Supplementary material
Source: PubMed Central journal article supplement (PMC4858983)
Supplement: 10.1074_M115.701813_jbc.M115.701813-1.pdf [file 10.1074_M115.701813_jbc.M115.701813-1.pdf]

## Targeted Ubiquitin System (TUS) library

93 mutant *Saccharomyces cerevisiae* strains of most of the non-essential E2s and E3s are included in the library and used for the experiments described in Fig. 2A.

|   | 1          | 2       | 3       | 4         | 5     | 6         | 7    | 8       | 9          | 10           | 11           | 12           |
|---|------------|---------|---------|-----------|-------|-----------|------|---------|------------|--------------|--------------|--------------|
| A | VPS8       | SEA4    | YBR062C | RAD16     | AMN1  | COS111    | SAF1 | RAD18   | SLX5       | BRE1         | UFD2         | VMS1         |
| B | STE5       | YDR131C | SAN1    | MFB1      | RMD5  | PEX10     | HEL2 | YDR306C | PIB1       | TOM1         | <i>empty</i> | MOT2/NOT4    |
| C | SLX8       | CDH1    | SNT2    | HUL5      | CUL3  | UBR1      | ETP1 | DMA1    | SSM4/DOA10 | FYV10        | RTT101       | DAS1         |
| D | FAR1       | RCY1    | PEX2    | HUL4      | RAD7  | GRR1      | UFD4 | TUL1    | HEL1       | <i>empty</i> | RAD5         | HRT3         |
| E | PEP3/VPS18 | YLR224W | IRC20   | YLR352W   | MDM30 | MAG2      | ITT1 | UFO1    | PEX12      | ASI1         | PEP5/VPS11   | RKR1/LTN1    |
| F | YMR258C    | ASI3    | FAP1    | DMA2      | ELA1  | SKP2      | HRD1 | PSH1    | RTC1       | DIA2         | ULS1         | ASR1         |
| G | GIR2       | YIH1    | GCN2    | MTC4/SEA3 | DOA4  | SHP1/UBX1 | UBX2 | UBX3    | UBX4       | UBX5         | UBX6         | UBX7         |
| H | DOA1       | UBC2    | UBC4    | UBC5      | UBC6* | UBC7      | UBC8 | UBC10   | UBC11      | UBC12        | UBC13        | <i>empty</i> |

The library was obtained from Mark Hochstrasser's lab, and used previously by T. Ravid and M. Hochstrasser (Nat Cell Biol 9, 422-27)
